# Supplementary material for: Modification in implementation of the inferior alveolar nerve block technique
Source: Research Square preprint supplement (doi:10.21203/rs.3.rs-1599913/v1), 2022-05-05

Randomized  
sample size (42 patients)

Split-mouth  
& single blind  
design

Sites & techniques were Randomized for the first surgery  
then the versus site, with the other method, was implemented

Modified IANB  
technique (n=42)

Conventional IANB  
technique (n=42)

Every patient had surgery on the other site, with  
the differing technique, with two weeks apart.

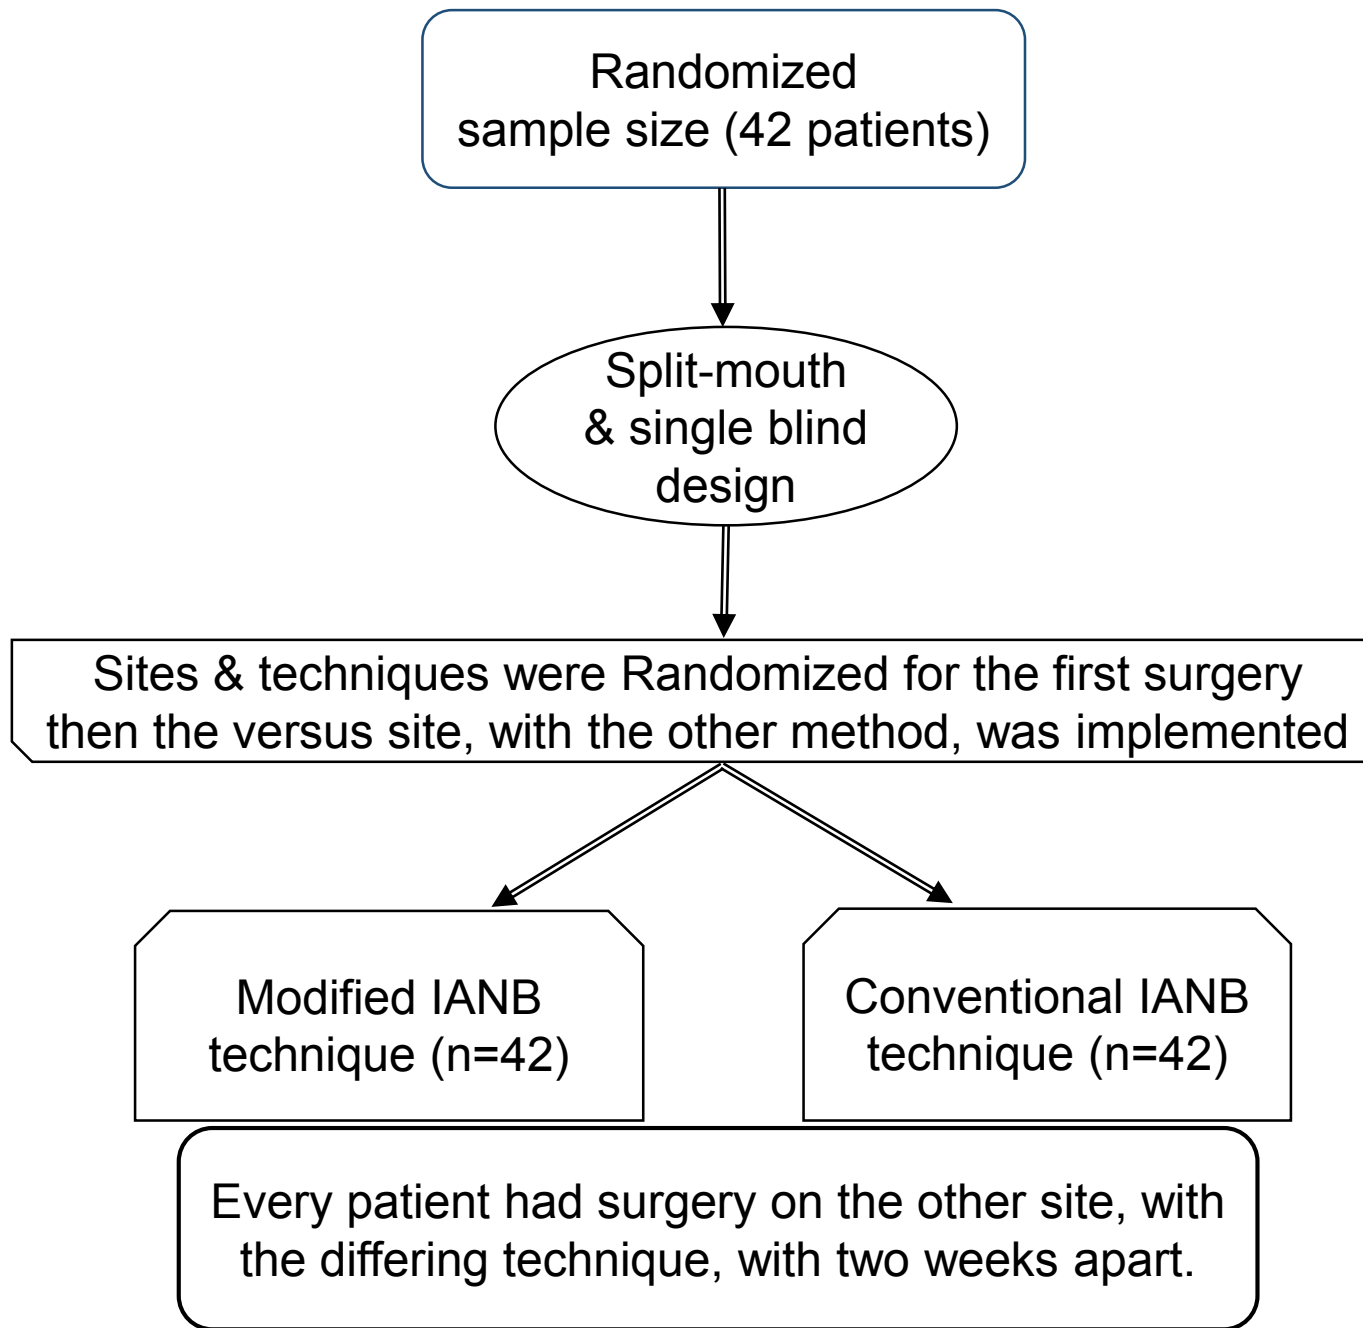

Supplement: Supplementary file 1 [file 2e847a80674b0cf204890af8.pdf]
